# Supplementary material
Source: publisher figshare collection journal article supplement (https://gsapubs.figshare.com/articles/dataset/_/12528809)
Supplement: Supplementary file 1 [file 1]

## Map of Carlsbad Cavern Big Room

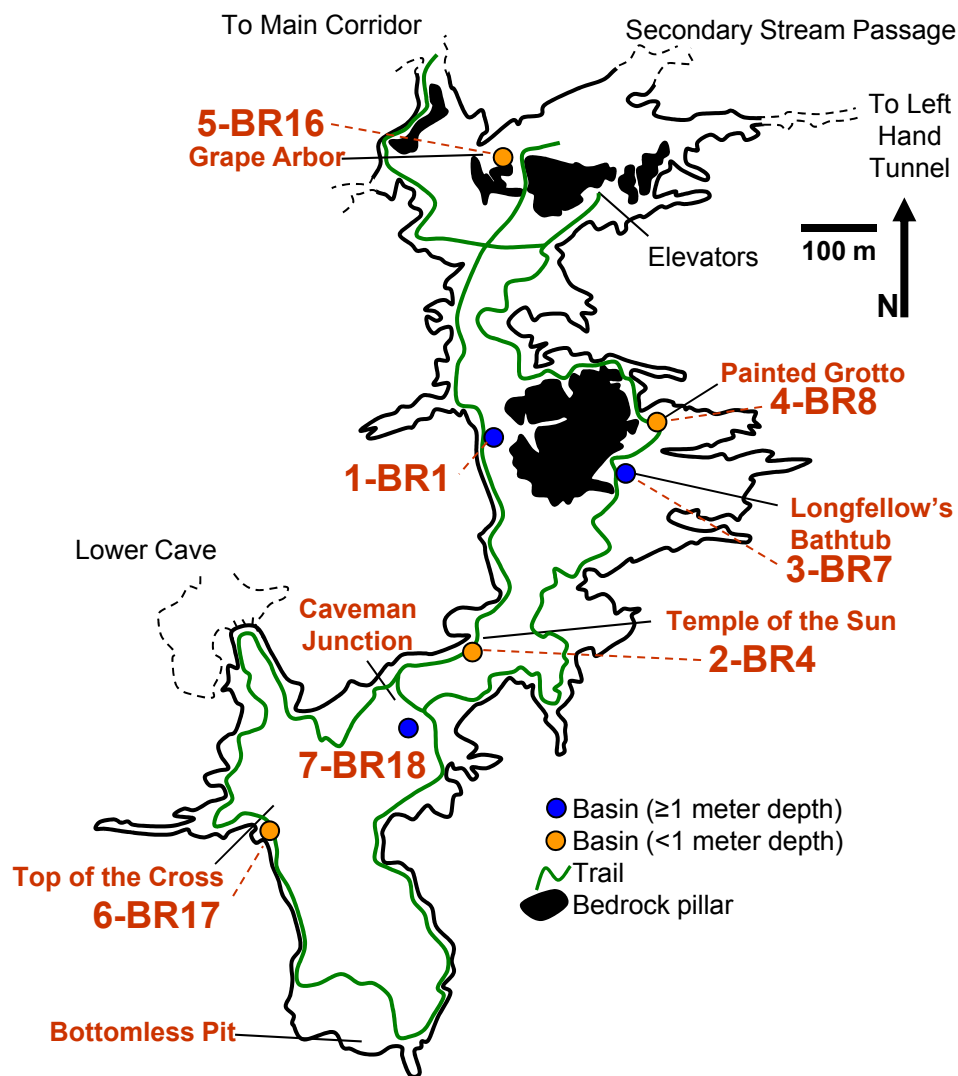

**Figure DR1:** Map of Big Room showing public trail and sample areas. Map traced from Cave Research Foundation map of Carlsbad Cavern.

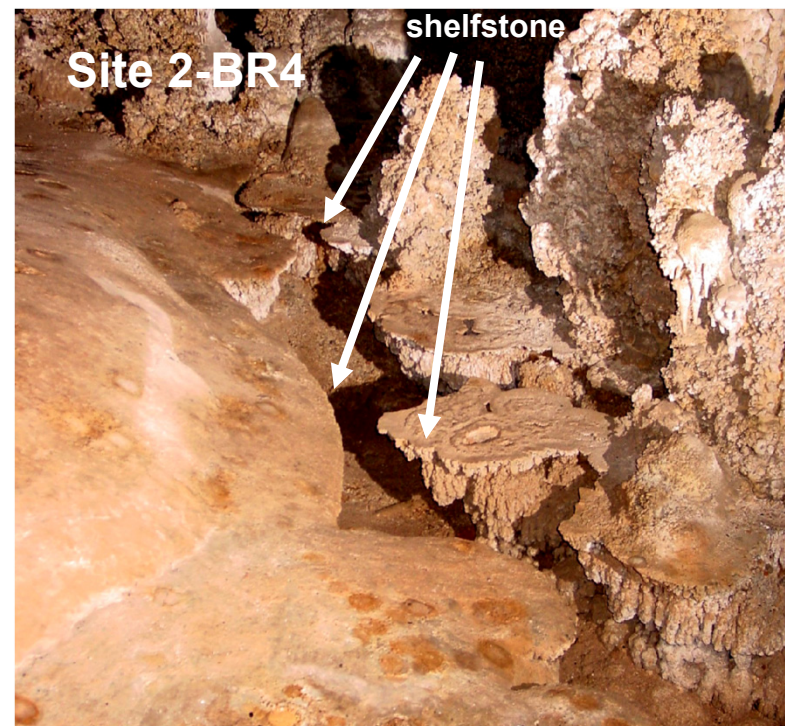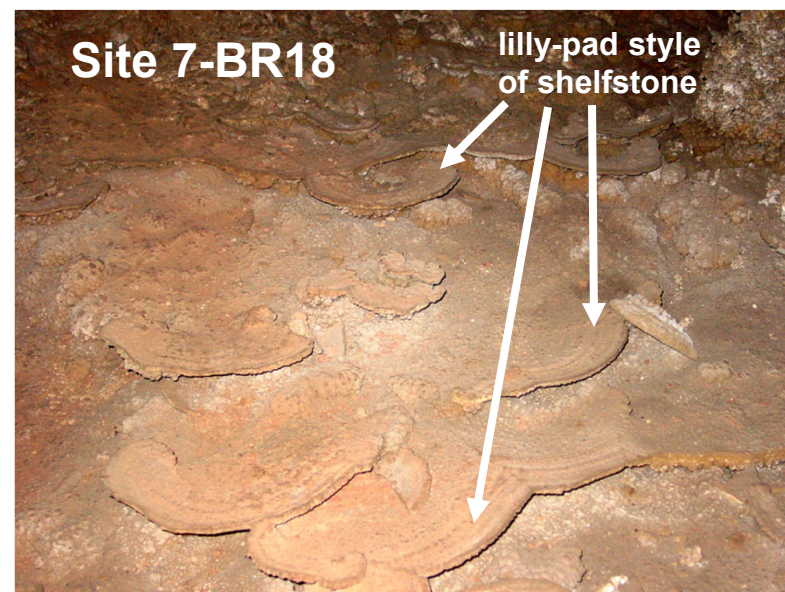

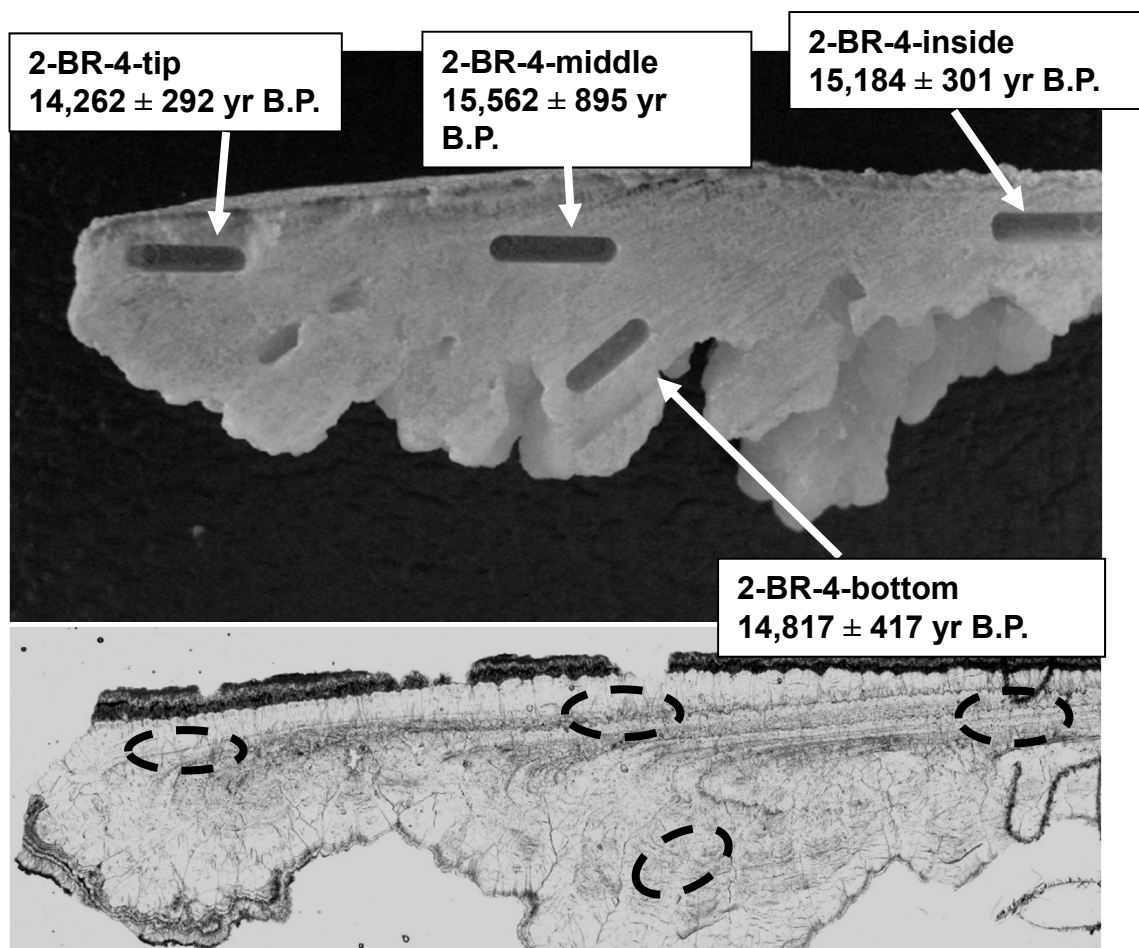

**Figure DR2(A):** Photograph (top image) and thin-section micrograph (bottom image) of shelfstone sample #2-BR-4 from Big Room of Carlsbad Cavern. Four U-series ages show that the shelfstone formed between 15.6 and 14.3 ky B.P. The shelfstone speleothems formed only when the pool basins were full to the brim.

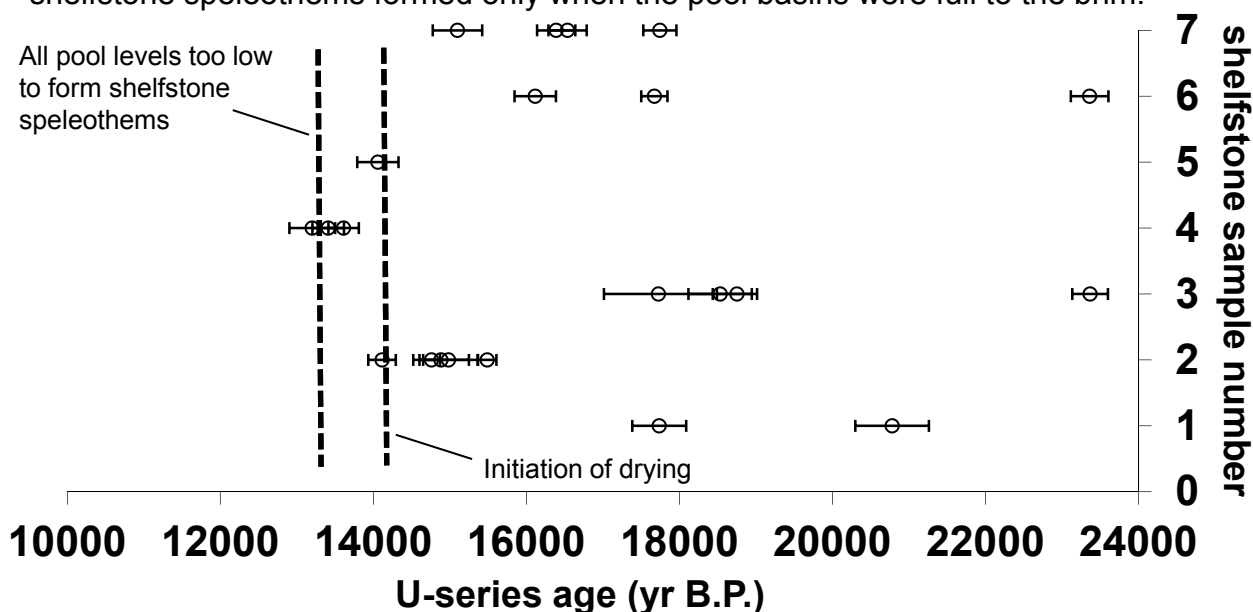

**Figure DR2(B):** All U-series age data for seven shelfstones (from seven pool basins in Carlsbad Cavern) indicate that termination of shelfstone growth was by 13.3 ka, supporting increasingly drier conditions beginning at ~14.5 ka.

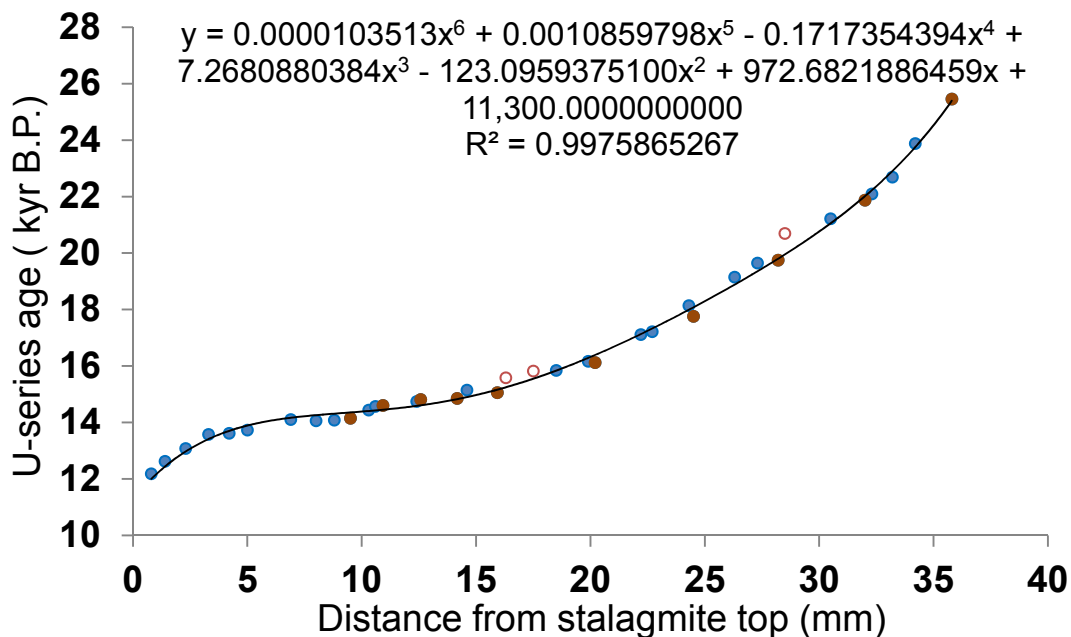

**Figure DR3a.** The chronology for the top 9000 years of stalagmite FS2 is based on 26 previously published U-series dates (Asmerom et al. 2010) (blue data points) three of which were rejected for the final chronology (empty red circles), and ten new U-series dates (**Table DR4**, brown data points). Top of stalagmite was set to 11,300 yr B.P. based on a polynomial curve of the youngest nine dates.

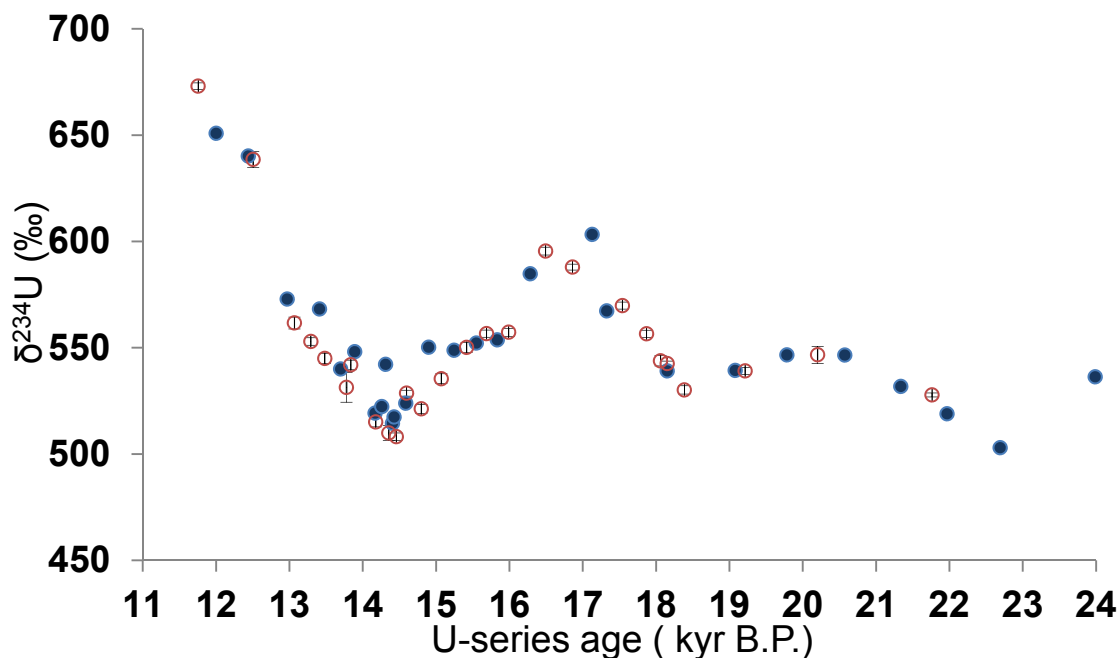

**Figure DR3b.**  $\delta^{234}\text{U}$  data versus U-series chronology. The blue data points are from the FS2 chronology data (Asmerom et al. 2010) from relatively large powders (50-200 mg), and the brown data points represent measurements taken from a separate transect (**Table DR3**) from small powders (2-6 mg).



**Table DR1.** Uranium-series data for Big Room shelfstone samples, Carlsbad Cavern.

| sample          | <sup>238</sup> U<br>(ng/g) | <sup>232</sup> Th<br>(pg/g) | <sup>230</sup> Th/ <sup>232</sup> Th<br>act. ratio | <sup>230</sup> Th/ <sup>238</sup> U<br>act. ratio | measured<br>$\delta^{234}\text{U}$<br>(‰) | initial<br>$\delta^{234}\text{U}$<br>(‰) | uncorrected<br>age<br>(yrs BP) | corrected<br>age<br>(yrs BP) |
|-----------------|----------------------------|-----------------------------|----------------------------------------------------|---------------------------------------------------|-------------------------------------------|------------------------------------------|--------------------------------|------------------------------|
| 1-BR-1-1        | 267.8 ± 1.4                | 1180 ± 53                   | 1496 ± 72                                          | 0.399 ± 0.007                                     | 1230 ± 12                                 | 1305 ± 13                                | 21154 ± 445                    | <b>20779 ± 481</b>           |
| 1-BR-1-2        | 327.8 ± 1.6                | 9334 ± 34                   | 37 ± 0                                             | 0.348 ± 0.003                                     | 1220 ± 9                                  | 1282 ± 10                                | 18353 ± 174                    | <b>17735 ± 352</b>           |
| 2-BR-4-1        | 713.7 ± 6.2                | 2116 ± 27                   | 965 ± 24                                           | 0.173 ± 0.004                                     | 325 ± 9                                   | 339 ± 10                                 | 15211 ± 393                    | 14917 ± 417                  |
| 2-BR-4-1(2)     | 717.6 ± 7.6                | 2132 ± 34                   | 981 ± 53                                           | 0.177 ± 0.009                                     | 321 ± 10                                  | 335 ± 11                                 | 15580 ± 897                    | 15286 ± 906                  |
|                 |                            |                             |                                                    |                                                   |                                           | <b>weight-averaged =</b>                 |                                | <b>14982 ± 380</b>           |
| 2-BR-4-tip      | 614.2 ± 3                  | 1130 ± 45                   | 1511 ± 65                                          | 0.168 ± 0.003                                     | 344 ± 6                                   | 358 ± 7                                  | 14535 ± 259                    | 14262 ± 292                  |
| 2-BR-4-tip icp  | 612.2 ± 1                  | 1179 ± 45                   | 1440 ± 55                                          | 0.168 ± 0.001                                     | 361 ± 14                                  | 376 ± 15                                 | 14302 ± 175                    | 14028 ± 220                  |
|                 |                            |                             |                                                    |                                                   |                                           | <b>weight-averaged =</b>                 |                                | <b>14113 ± 180</b>           |
| 2-BR-4-mid      | 703.1 ± 3                  | 1197 ± 47                   | 1685 ± 74                                          | 0.174 ± 0.004                                     | 337 ± 5                                   | 351 ± 5                                  | 15128 ± 344                    | <b>14884 ± 364</b>           |
| 2-BR-4-int      | 728.7 ± 4                  | 2248 ± 34                   | 942 ± 19                                           | 0.176 ± 0.003                                     | 325 ± 6                                   | 339 ± 6                                  | 15478 ± 264                    | 15184 ± 301                  |
| 2-BR-4-int icp  | 726.1 ± 3                  | 2445 ± 34                   | 881 ± 13                                           | 0.180 ± 0.001                                     | 323 ± 2                                   | 337 ± 2                                  | 15845 ± 126                    | 15542 ± 197                  |
| 2-BR-4-int icp2 | 728.6 ± 2                  | 2570 ± 33                   | 841 ± 11                                           | 0.180 ± 0.001                                     | 322 ± 1                                   | 337 ± 1                                  | 15850 ± 72                     | 15542 ± 170                  |
|                 |                            |                             |                                                    |                                                   |                                           | <b>weight-averaged =</b>                 |                                | <b>15487 ± 120</b>           |
| 2-BR-4-bot      | 615.8 ± 4                  | 367 ± 66                    | 4809 ± 875                                         | 0.173 ± 0.004                                     | 344 ± 9                                   | 358 ± 10                                 | 15005 ± 406                    | 14817 ± 417                  |
| 2-BR-4-bot icp  | 615.1 ± 3                  | 403 ± 66                    | 4358 ± 716                                         | 0.173 ± 0.001                                     | 332 ± 3                                   | 346 ± 3                                  | 15087 ± 122                    | 14892 ± 159                  |
| 2-BR-4-bot icp1 | 615.5 ± 1                  | 533 ± 66                    | 3244 ± 403                                         | 0.170 ± 0.001                                     | 332 ± 1                                   | 346 ± 1                                  | 14848 ± 103                    | 14634 ± 151                  |
|                 |                            |                             |                                                    |                                                   |                                           | <b>weight-averaged =</b>                 |                                | <b>14760 ± 110</b>           |
| 3-BR-7          | 277.1 ± 2.1                | 3591 ± 54                   | 417 ± 8                                            | 0.327 ± 0.004                                     | 1011 ± 13                                 | 1066 ± 14                                | 19117 ± 297                    | <b>18531 ± 414</b>           |
| 3-BR-8-bot      | 296.7 ± 0.8                | 1445 ± 54                   | 261 ± 10                                           | 0.415 ± 0.002                                     | 1089 ± 3                                  | 1163 ± 3                                 | 23751 ± 132                    | <b>23365 ± 234</b>           |
| 3-BR-9-mid      | 355.4 ± 1.0                | 4236 ± 51                   | 84 ± 1                                             | 0.329 ± 0.002                                     | 1012 ± 3                                  | 1067 ± 3                                 | 19234 ± 106                    | <b>18751 ± 263</b>           |
| 3-BR-10-top     | 475.4 ± 1.3                | 46987 ± 203                 | 10 ± 0                                             | 0.326 ± 0.002                                     | 1002 ± 2                                  | 1053 ± 3                                 | 19133 ± 113                    | <b>17724 ± 711</b>           |
| 4-BR-8          | 310.2 ± 0.8                | 433 ± 41                    | 399 ± 38                                           | 0.000 ± 0.000                                     | 532 ± 2                                   | 552 ± 2                                  | 13754 ± 110                    | <b>13410 ± 206</b>           |
| 4-BR-8-2        | 300.6 ± 0.8                | 207 ± 51                    | 810 ± 200                                          | 0.000 ± 0.000                                     | 520 ± 2                                   | 540 ± 2                                  | 13890 ± 124                    | <b>13611 ± 199</b>           |
| 4-BR-8-3        | 318.0 ± 0.8                | 2060 ± 55                   | 86 ± 2                                             | 0.002 ± 0.000                                     | 538 ± 2                                   | 558 ± 2                                  | 13201 ± 299                    | <b>13201 ± 299</b>           |
| 5-BR-16-1       | 262.1 ± 1.1                | 1656 ± 29                   | 620 ± 15                                           | 0.237 ± 0.004                                     | 867 ± 6                                   | 902 ± 6                                  | 14679 ± 282                    | 14159 ± 382                  |
| 5-BR-16-1(2)    | 261.9 ± 1.4                | 1708 ± 30                   | 598 ± 15                                           | 0.236 ± 0.004                                     | 886 ± 12                                  | 922 ± 12                                 | 14475 ± 295                    | 13955 ± 391                  |
|                 |                            |                             |                                                    |                                                   |                                           | <b>weight-averaged =</b>                 |                                | <b>14059 ± 270</b>           |
| 6-BR-17-1       | 499.0 ± 1.7                | 7775 ± 35                   | 215 ± 3                                            | 0.203 ± 0.003                                     | 421 ± 4                                   | 441 ± 4                                  | 16697 ± 255                    | 16093 ± 394                  |
| 6-BR-17-1(2)2   | 499.6 ± 2.5                | 7760 ± 41                   | 217 ± 3                                            | 0.204 ± 0.003                                     | 426 ± 7                                   | 446 ± 7                                  | 16738 ± 243                    | 16137 ± 384                  |
|                 |                            |                             |                                                    |                                                   |                                           | <b>weight-averaged =</b>                 |                                | <b>16115 ± 270</b>           |
| 6-BR-17-3       | 454.3 ± 1.2                | 465 ± 43                    | 651 ± 60                                           | 0.218 ± 0.001                                     | 430 ± 2                                   | 452 ± 2                                  | 17929 ± 111                    | <b>17671 ± 171</b>           |
| 6-BR-17-4       | 460.2 ± 1.3                | 1924 ± 48                   | 205 ± 5                                            | 0.280 ± 0.001                                     | 420 ± 2                                   | 448 ± 2                                  | 23768 ± 137                    | <b>23360 ± 245</b>           |
| 7-BR-18-1       | 693.7 ± 4.2                | 7424 ± 33                   | 299 ± 3                                            | 0.194 ± 0.002                                     | 349 ± 6                                   | 366 ± 7                                  | 16841 ± 206                    | 16390 ± 303                  |
| 7-BR-18-1(2)    | 694.3 ± 5.0                | 7542 ± 41                   | 295 ± 5                                            | 0.194 ± 0.004                                     | 348 ± 8                                   | 365 ± 8                                  | 16841 ± 364                    | 16387 ± 426                  |
|                 |                            |                             |                                                    |                                                   |                                           | <b>weight-averaged =</b>                 |                                | <b>16389 ± 250</b>           |
| 7-BR-18-bot     | 521.1 ± 1.5                | 1919 ± 52                   | 173 ± 5                                            | 0.209 ± 0.001                                     | 357 ± 2                                   | 375 ± 2                                  | 18122 ± 105                    | <b>17743 ± 216</b>           |
| 7-BR-18-mid     | 523.6 ± 1.4                | 3478 ± 48                   | 90 ± 1                                             | 0.196 ± 0.001                                     | 352 ± 2                                   | 369 ± 2                                  | 17001 ± 96                     | <b>16537 ± 250</b>           |
| 7-BR-18-top     | 494.2 ± 1.3                | 7048 ± 53                   | 39 ± 0                                             | 0.182 ± 0.001                                     | 352 ± 2                                   | 367 ± 2                                  | 15720 ± 89                     | <b>15098 ± 323</b>           |

Corrected ages use a calculated initial <sup>230</sup>Th/<sup>232</sup>Th atomic ratio X, where X = 0.0033 x (<sup>232</sup>Th ppt)<sup>-0.6664</sup> ± 50%. Years before present = cal. yr B.P., where present is AD 2006. All errors are absolute 2σ. Subsample sizes ranged from 50 to 250 mg. Some subsamples were multiple runs on TIMS or runs on both TIMS and ICP and were weight-averaged.

**Table DR2:** Carbon and oxygen stable isotope data for Stalagmite FS2 from 25 to 11 kyr B.P.

| Age   | $\delta^{18}\text{O}$ | $\delta^{13}\text{C}$ |
|-------|-----------------------|-----------------------|-------|-----------------------|-----------------------|-------|-----------------------|-----------------------|-------|-----------------------|-----------------------|-------|-----------------------|-----------------------|
| 11396 | -2.05                 | -6.28                 | 14196 | -6.64                 | -5.96                 | 14847 | -7.60                 | -11.27                | 16823 | -5.39                 | -8.92                 | 20575 | -5.09                 | -7.17                 |
| 11490 | -1.79                 | -6.30                 | 14205 | -6.58                 | -5.88                 | 14864 | -6.94                 | -9.39                 | 16860 | -5.26                 | -8.87                 | 20630 | -5.01                 | -7.22                 |
| 11581 | -1.91                 | -6.39                 | 14213 | -6.52                 | -5.86                 | 14881 | -6.26                 | -9.59                 | 16898 | -5.04                 | -9.08                 | 20684 | -5.27                 | -7.11                 |
| 11670 | -2.06                 | -7.29                 | 14221 | -6.58                 | -5.96                 | 14899 | -6.93                 | -8.79                 | 16936 | -5.04                 | -9.22                 | 20736 | -5.12                 | -7.18                 |
| 11756 | -2.02                 | -7.91                 | 14229 | -6.55                 | -6.04                 | 14917 | -6.91                 | -8.61                 | 16974 | -5.00                 | -9.39                 | 20786 | -5.13                 | -7.74                 |
| 11841 | -1.77                 | -7.65                 | 14237 | -6.62                 | -6.25                 | 14935 | -6.78                 | -8.64                 | 17013 | -4.77                 | -9.68                 | 20833 | -5.14                 | -7.80                 |
| 11923 | -1.68                 | -8.00                 | 14245 | -6.63                 | -6.30                 | 14953 | -6.82                 | -8.66                 | 17051 | -4.74                 | -9.09                 | 20879 | -5.39                 | -8.29                 |
| 12003 | -1.63                 | -8.22                 | 14252 | -6.65                 | -6.29                 | 14972 | -6.74                 | -8.43                 | 17090 | -4.74                 | -8.72                 | 20923 | -5.24                 | -8.14                 |
| 12081 | -1.65                 | -8.29                 | 14259 | -6.75                 | -6.16                 | 14991 | -6.80                 | -8.68                 | 17129 | -4.57                 | -8.18                 | 20964 | -5.28                 | -9.03                 |
| 12157 | -1.63                 | -8.03                 | 14267 | -6.86                 | -6.13                 | 15010 | -6.60                 | -8.54                 | 17169 | -4.49                 | -7.85                 | 21004 | -5.25                 | -9.66                 |
| 12230 | -1.40                 | -7.31                 | 14273 | -6.94                 | -6.17                 | 15030 | -6.77                 | -8.89                 | 17208 | -4.50                 | -7.80                 | 21041 | -5.25                 | -9.82                 |
| 12302 | -1.94                 | -8.47                 | 14280 | -6.99                 | -6.22                 | 15050 | -6.59                 | -8.58                 | 17248 | -4.50                 | -7.58                 | 21077 | -4.94                 | -8.93                 |
| 12372 | -2.24                 | -8.53                 | 14287 | -6.87                 | -6.32                 | 15071 | -6.62                 | -8.51                 | 17287 | -4.38                 | -7.37                 | 21111 | -4.91                 | -8.35                 |
| 12440 | -2.36                 | -8.48                 | 14293 | -6.87                 | -6.40                 | 15091 | -6.53                 | -8.13                 | 17327 | -4.39                 | -7.53                 | 21144 | -5.00                 | -7.77                 |
| 12506 | -2.46                 | -8.74                 | 14300 | -6.85                 | -6.55                 | 15113 | -6.53                 | -7.85                 | 17338 | -4.46                 | -8.07                 | 21175 | -5.16                 | -8.03                 |
| 12570 | -2.55                 | -8.83                 | 14306 | -7.07                 | -6.81                 | 15134 | -6.50                 | -7.42                 | 17446 | -4.53                 | -9.12                 | 21204 | -5.16                 | -8.41                 |
| 12632 | -2.79                 | -8.33                 | 14312 | -7.09                 | -6.91                 | 15156 | -6.62                 | -7.32                 | 17541 | -4.68                 | -9.66                 | 21233 | -5.12                 | -8.62                 |
| 12693 | -3.06                 | -7.40                 | 14319 | -6.96                 | -7.06                 | 15178 | -6.65                 | -7.35                 | 17624 | -4.74                 | -9.67                 | 21260 | -4.90                 | -8.74                 |
| 12751 | -3.28                 | -6.89                 | 14325 | -6.87                 | -6.96                 | 15200 | -6.24                 | -7.80                 | 17698 | -4.76                 | -9.45                 | 21286 | -4.81                 | -8.52                 |
| 12808 | -3.48                 | -6.78                 | 14331 | -6.81                 | -6.83                 | 15223 | -6.46                 | -7.74                 | 17762 | -4.82                 | -8.90                 | 21312 | -4.70                 | -8.19                 |
| 12864 | -3.70                 | -6.55                 | 14337 | -6.75                 | -6.70                 | 15246 | -6.43                 | -7.69                 | 17820 | -4.78                 | -8.34                 | 21337 | -4.61                 | -7.88                 |
| 12918 | -3.98                 | -7.02                 | 14343 | -6.71                 | -6.43                 | 15270 | -6.41                 | -7.40                 | 17871 | -4.81                 | -8.26                 | 21362 | -4.65                 | -7.62                 |
| 12970 | -4.12                 | -7.20                 | 14349 | -6.72                 | -6.29                 | 15293 | -6.39                 | -7.36                 | 17916 | -4.79                 | -8.75                 | 21386 | -4.80                 | -7.82                 |
| 13020 | -4.26                 | -7.15                 | 14355 | -6.66                 | -6.13                 | 15318 | -6.66                 | -8.51                 | 17957 | -4.82                 | -9.69                 | 21411 | -4.82                 | -8.14                 |
| 13069 | -4.38                 | -6.89                 | 14362 | -6.76                 | -6.04                 | 15342 | -6.40                 | -7.39                 | 17995 | -4.83                 | -9.36                 | 21436 | -4.91                 | -8.76                 |
| 13117 | -4.54                 | -6.74                 | 14368 | -6.79                 | -6.15                 | 15367 | -6.53                 | -7.61                 | 18029 | -4.86                 | -9.04                 | 21462 | -4.90                 | -9.30                 |
| 13163 | -4.63                 | -6.41                 | 14374 | -6.79                 | -5.97                 | 15392 | -6.41                 | -7.41                 | 18062 | -4.91                 | -8.57                 | 21488 | -4.85                 | -9.17                 |
| 13208 | -4.72                 | -6.64                 | 14380 | -6.94                 | -5.89                 | 15417 | -6.46                 | -7.39                 | 18093 | -5.03                 | -8.60                 | 21516 | -4.80                 | -9.24                 |
| 13251 | -4.63                 | -6.49                 | 14387 | -7.02                 | -6.02                 | 15443 | -7.38                 | -9.14                 | 18123 | -5.11                 | -8.01                 | 21545 | -4.63                 | -9.12                 |
| 13293 | -4.63                 | -6.54                 | 14393 | -6.97                 | -6.14                 | 15469 | -6.53                 | -7.20                 | 18153 | -5.11                 | -8.39                 | 21576 | -4.64                 | -9.11                 |
| 13333 | -4.68                 | -6.39                 | 14400 | -6.90                 | -5.71                 | 15495 | -6.78                 | -7.47                 | 18183 | -5.09                 | -8.47                 | 21608 | -4.73                 | -9.37                 |
| 13373 | -4.69                 | -6.34                 | 14407 | -7.00                 | -5.82                 | 15522 | -6.71                 | -7.44                 | 18214 | -5.07                 | -8.17                 | 21643 | -4.63                 | -9.65                 |
| 13411 | -4.73                 | -6.39                 | 14414 | -7.04                 | -5.89                 | 15549 | -6.69                 | -7.24                 | 18245 | -5.02                 | -7.80                 | 21680 | -4.56                 | -10.23                |
| 13447 | -4.84                 | -6.42                 | 14421 | -7.08                 | -5.68                 | 15576 | -6.72                 | -6.94                 | 18278 | -5.04                 | -7.18                 | 21720 | -4.42                 | -10.09                |
| 13483 | -5.13                 | -6.54                 | 14428 | -7.06                 | -5.81                 | 15604 | -6.81                 | -7.25                 | 18313 | -5.06                 | -7.05                 | 21763 | -4.72                 | -10.53                |
| 13517 | -5.29                 | -6.89                 | 14435 | -7.06                 | -5.81                 | 15632 | -6.90                 | -7.71                 | 18349 | -4.99                 | -6.94                 | 21809 | -4.55                 | -9.84                 |
| 13550 | -5.36                 | -6.78                 | 14442 | -7.05                 | -5.78                 | 15660 | -6.81                 | -7.60                 | 18387 | -4.92                 | -7.02                 | 21858 | -4.49                 | -10.02                |
| 13583 | -5.35                 | -6.52                 | 14450 | -7.08                 | -5.79                 | 15689 | -6.88                 | -7.44                 | 18427 | -4.94                 | -7.54                 | 21912 | -4.41                 | -9.92                 |
| 13614 | -5.58                 | -6.44                 | 14458 | -7.00                 | -5.63                 | 15717 | -6.98                 | -7.20                 | 18469 | -4.93                 | -8.23                 | 21969 | -4.41                 | -9.81                 |
| 13644 | -5.55                 | -6.29                 | 14465 | -7.16                 | -5.61                 | 15747 | -6.87                 | -6.87                 | 18514 | -5.00                 | -8.01                 | 22030 | -4.40                 | -9.77                 |
| 13672 | -5.61                 | -6.25                 | 14474 | -7.14                 | -5.64                 | 15776 | -7.06                 | -7.40                 | 18560 | -5.02                 | -7.09                 | 22096 | -4.49                 | -9.19                 |
| 13700 | -5.63                 | -6.21                 | 14482 | -7.29                 | -5.94                 | 15806 | -6.99                 | -7.34                 | 18609 | -4.99                 | -7.37                 | 22166 | -4.44                 | -8.54                 |
| 13727 | -5.61                 | -6.16                 | 14490 | -7.38                 | -6.01                 | 15836 | -6.96                 | -7.43                 | 18661 | -4.99                 | -6.57                 | 22241 | -4.48                 | -8.55                 |
| 13753 | -5.71                 | -6.49                 | 14499 | -7.45                 | -6.51                 | 15866 | -7.02                 | -6.94                 | 18714 | -5.03                 | -6.53                 | 22321 | -4.36                 | -8.74                 |
| 13778 | -5.72                 | -6.22                 | 14508 | -7.45                 | -6.73                 | 15897 | -7.27                 | -7.06                 | 18770 | -5.05                 | -6.85                 | 22406 | -4.40                 | -8.94                 |
| 13803 | -5.88                 | -6.84                 | 14517 | -7.59                 | -6.76                 | 15928 | -7.47                 | -7.24                 | 18828 | -4.94                 | -6.84                 | 22497 | -4.37                 | -9.19                 |
| 13826 | -5.91                 | -6.72                 | 14526 | -7.53                 | -6.98                 | 15959 | -7.30                 | -6.95                 | 18888 | -4.86                 | -7.27                 | 22592 | -4.53                 | -9.82                 |
| 13848 | -5.93                 | -6.63                 | 14536 | -7.46                 | -6.99                 | 15990 | -7.16                 | -6.78                 | 18950 | -4.79                 | -7.49                 | 22693 | -4.49                 | -9.93                 |
| 13870 | -5.95                 | -6.67                 | 14546 | -7.37                 | -6.79                 | 16022 | -7.24                 | -6.96                 | 19014 | -4.82                 | -7.49                 | 22799 | -4.54                 | -10.27                |
| 13891 | -6.06                 | -6.67                 | 14556 | -7.20                 | -6.36                 | 16054 | -7.59                 | -8.01                 | 19079 | -4.92                 | -7.44                 | 22911 | -5.00                 | -9.98                 |
| 13911 | -6.13                 | -6.70                 | 14566 | -7.22                 | -6.42                 | 16086 | -7.07                 | -6.89                 | 19146 | -4.93                 | -7.28                 | 23028 | -4.43                 | -10.72                |
| 13930 | -6.21                 | -6.71                 | 14577 | -7.28                 | -5.98                 | 16119 | -6.96                 | -6.78                 | 19214 | -4.98                 | -7.11                 | 23151 | -4.41                 | -10.20                |
| 13949 | -6.26                 | -6.72                 | 14587 | -7.16                 | -5.62                 | 16152 | -7.19                 | -7.57                 | 19283 | -5.00                 | -7.11                 | 23278 | -4.39                 | -9.49                 |
| 13967 | -6.27                 | -6.69                 | 14598 | -7.07                 | -5.50                 | 16185 | -6.96                 | -7.34                 | 19353 | -5.03                 | -7.61                 | 23411 | -4.46                 | -9.64                 |
| 13984 | -6.33                 | -6.68                 | 14610 | -6.99                 | -5.55                 | 16218 | -6.73                 | -7.21                 | 19424 | -5.02                 | -8.35                 | 23549 | -4.36                 | -9.13                 |
| 14001 | -6.40                 | -6.40                 | 14621 | -7.13                 | -5.69                 | 16252 | -6.64                 | -7.24                 | 19496 | -5.01                 | -8.48                 | 23691 | -4.38                 | -9.15                 |
| 14017 | -6.49                 | -6.31                 | 14633 | -7.11                 | -5.85                 | 16286 | -6.44                 | -6.65                 | 19568 | -4.96                 | -7.79                 | 23837 | -4.41                 | -9.47                 |
| 14032 | -6.52                 | -6.43                 | 14645 | -7.12                 | -6.11                 | 16320 | -6.33                 | -6.56                 | 19640 | -4.91                 | -7.40                 | 23988 | -4.44                 | -9.20                 |
| 14047 | -6.52                 | -6.39                 | 14658 | -7.16                 | -6.32                 | 16354 | -6.00                 | -7.38                 | 19712 | -4.87                 | -7.36                 | 24143 | -4.63                 | -9.31                 |
| 14061 | -6.52                 | -6.21                 | 14671 | -7.04                 | -6.47                 | 16389 | -5.99                 | -7.56                 | 19784 | -4.88                 | -7.67                 | 24300 | -4.60                 | -10.01                |
| 14075 | -6.50                 | -6.18                 | 14684 | -6.86                 | -6.47                 | 16424 | -5.96                 | -7.92                 | 19855 | -4.84                 | -7.97                 | 24461 | -4.21                 | -9.80                 |
| 14088 | -6.18                 | -5.96                 | 14697 | -6.94                 | -7.12                 | 16459 | -5.84                 | -7.89                 | 19927 | -4.78                 | -8.33                 | 24623 | -4.56                 | -9.30                 |
| 14101 | -6.45                 | -6.05                 | 14711 | -6.94                 | -7.32                 | 16494 | -5.80                 | -8.17                 | 19997 | -4.74                 | -8.54                 | 24787 | -3.85                 | -9.17                 |
| 14113 | -6.50                 | -6.23                 | 14725 | -7.10                 | -7.75                 | 16530 | -5.59                 | -8.27                 | 20066 | -4.78                 | -7.98                 | 24952 | -3.19                 | -9.06                 |
| 14124 | -6.55                 | -6.22                 | 14739 | -7.00                 | -7.84                 | 16566 | -5.64                 | -8.82                 | 20135 | -4.88                 | -7.59                 |       |                       |                       |
| 14136 | -6.57                 | -5.96                 | 14753 | -7.08                 | -8.34                 | 16602 | -5.47                 | -9.00                 | 20202 | -4.86                 | -7.18                 |       |                       |                       |
| 14147 | -6.67                 | -6.13                 | 14768 | -6.90                 | -8.92                 | 16638 | -5.43                 | -9.26                 | 20268 | -4.89                 | -6.92                 |       |                       |                       |
| 14157 | -6.70                 | -5.80                 | 14783 | -6.89                 | -9.27                 | 16675 | -5.34                 | -9.15                 | 20333 | -4.92                 | -6.89                 |       |                       |                       |
| 14167 | -6.33                 | -5.77                 | 14799 | -6.74                 | -9.51                 | 16711 | -5.48                 | -9.29                 | 20396 | -4.92                 | -6.98                 |       |                       |                       |
| 14177 | -6.69                 | -6.20                 | 14815 | -6.48                 | -9.68                 | 16748 | -5.29                 | -8.83                 | 20457 | -4.97                 | -7.32                 |       |                       |                       |
| 14187 | -6.68                 | -6.23                 | 14831 | -6.85                 | -9.49                 | 16785 | -5.36                 | -8.68                 | 20517 | -5.08                 | -7.16                 |       |                       |                       |

Carbon and oxygen stable isotope values in ‰, VPDB.

**Table DR3:**  $\delta^{234}\text{U}$  values for stalagmite FS2 from 20 to 11.5 kyr B.P.

| Sub-sample                                                                             | Dist (mm) | Age (calc) | $^{234}\text{U}/^{238}\text{U}$ (activity) | $\delta^{234}\text{U}$ (‰, meas) | $\delta^{234}\text{U}$ (calc) |
|----------------------------------------------------------------------------------------|-----------|------------|--------------------------------------------|----------------------------------|-------------------------------|
| FS2-0.5                                                                                | 0.5       | 11848      | 0.01249 ± 0.047                            | 651 + 2                          | <b>673</b>                    |
| FS2-1.5                                                                                | 1.5       | 12715      | 0.01223 ± 0.117                            | 616 + 4                          | <b>639</b>                    |
| FS2-2.5                                                                                | 2.5       | 13234      | 0.01166 ± 0.090                            | 541 + 3                          | <b>562</b>                    |
| FS2-3                                                                                  | 3         | 13404      | 0.01160 ± 0.058                            | 532 + 2                          | <b>553</b>                    |
| FS2-3.5                                                                                | 3.5       | 13532      | 0.01154 ± 0.079                            | 525 + 2                          | <b>545</b>                    |
| FS2-4.5                                                                                | 4.5       | 13706      | 0.01144 ± 0.075                            | 511 + 2                          | <b>531</b>                    |
| FS2-5                                                                                  | 5         | 13768      | 0.01151 ± 0.229                            | 521 + 7                          | <b>542</b>                    |
| FS2-7                                                                                  | 7         | 13971      | 0.01131 ± 0.076                            | 495 + 2                          | <b>515</b>                    |
| FS2-9.5                                                                                | 9.5       | 14304      | 0.01127 ± 0.118                            | 490 + 4                          | <b>510</b>                    |
| FS2-11                                                                                 | 11        | 14559      | 0.01126 ± 0.060                            | 488 + 2                          | <b>508</b>                    |
| FS2-12.5                                                                               | 12.5      | 14832      | 0.01140 ± 0.072                            | 507 + 2                          | <b>529</b>                    |
| FS2-14                                                                                 | 14        | 15100      | 0.01135 ± 0.046                            | 499 + 1                          | <b>521</b>                    |
| FS2-15.5                                                                               | 15.5      | 15358      | 0.01145 ± 0.078                            | 513 + 2                          | <b>535</b>                    |
| FS2-17                                                                                 | 17        | 15618      | 0.01155 ± 0.077                            | 526 + 2                          | <b>550</b>                    |
| FS2-18                                                                                 | 18        | 15808      | 0.01160 ± 0.056                            | 532 + 2                          | <b>557</b>                    |
| FS2-19                                                                                 | 19        | 16025      | 0.01160 ± 0.061                            | 533 + 2                          | <b>557</b>                    |
| FS2-20.5                                                                               | 20.5      | 16434      | 0.01187 ± 0.058                            | 568 + 2                          | <b>595</b>                    |
| FS2-21.5                                                                               | 21.5      | 16779      | 0.01181 ± 0.044                            | 561 + 1                          | <b>588</b>                    |
| FS2-23                                                                                 | 23        | 17423      | 0.01167 ± 0.053                            | 542 + 2                          | <b>570</b>                    |
| FS2-23.5                                                                               | 23.5      | 17669      | 0.01157 ± 0.056                            | 529 + 2                          | <b>557</b>                    |
| FS2-24                                                                                 | 24        | 17928      | 0.01148 ± 0.080                            | 517 + 2                          | <b>544</b>                    |
| FS2-25                                                                                 | 25        | 18472      | 0.01138 ± 0.065                            | 503 + 2                          | <b>530</b>                    |
| FS2-26.5                                                                               | 26.5      | 19264      | 0.01143 ± 0.055                            | 511 + 2                          | <b>539</b>                    |
| d $^{234}\text{U}$ values along a growth layer transect 6.5 mm from the stalagmite top |           |            |                                            |                                  |                               |
| FS2-7.0 L2                                                                             | 6.5       | 13920      | 0.01138 ± 0.078                            | 503 + 2                          | <b>524</b>                    |
| FS2-7.0 L1                                                                             | 6.5       | 13920      | 0.01141 ± 0.081                            | 508 + 2                          | <b>528</b>                    |
| FS2-7.0 C                                                                              | 6.5       | 13920      | 0.01136 ± 0.065                            | 501 + 2                          | <b>521</b>                    |
| FS2-7.0R1                                                                              | 6.5       | 13920      | 0.01134 ± 0.079                            | 499 + 2                          | <b>519</b>                    |
| FS2-7.0 R2                                                                             | 6.5       | 13920      | 0.01139 ± 0.084                            | 504 + 3                          | <b>525</b>                    |

$\delta^{234}\text{U}$  data added to data from the age data transect offered in Asmerom et al.(2010). Each subsample weight varied from 2-6 mg. Dist = distance from stalagmite top that sample was taken. Age was calculated using the age equation in **Figure DR3**. Errors on measured  $^{234}\text{U}/^{238}\text{U}$  activity and  $\delta^{234}\text{U}$  measured are percent  $1\sigma$ , and absolute  $2\sigma$ , respectively. Last five values were sampled along a single growth layer to test variation in values related to horizontal distance from stalagmite vertical center. The set of  $\delta^{234}\text{U}$  values in **Table DR3**, independent of those values previously reported (Asmerom et al., 2010) were derived from significantly smaller powders (2-6 mg) that were dissolved in 7N  $\text{HNO}_3$ , unspiked, and put through anion resin to separate the U fraction. The U isotopes were measured on the Thermo Neptune multicollector ICPMS. The final  $^{234}\text{U}/^{235}\text{U}$  measured values were age-corrected to obtain initial  $^{234}\text{U}/^{235}\text{U}$  values using the age/depth equation in **Fig. DR3**. Comparison to values measured during U-series age determinations are shown in **Fig. DR3**. Conversions from  $^{14}\text{C}$  to calendar ages are from the radiocarbon age to calendar age conversion database (Fairbanks et al., 2005).

**Table DR4.** Ten additional uranium-series dates for stalagmite FS2, Fort Stanton Cave.

| Sample /   | <sup>238</sup> U |          | <sup>232</sup> Th | <sup>230</sup> Th/ <sup>232</sup> Th | <sup>230</sup> Th/ <sup>238</sup> U | measured $\delta^{234}\text{U}$ | initial $\delta^{234}\text{U}$ | uncorrected age | corrected age      |
|------------|------------------|----------|-------------------|--------------------------------------|-------------------------------------|---------------------------------|--------------------------------|-----------------|--------------------|
|            | dist. (ng/g)     | (ng/g)   | (pg/g)            | act. ratio                           | act. ratio                          | (‰)                             | (‰)                            | (yrs BP)        | (yrs BP)           |
| FS2-9_3mm  | 9.5              | 929 ± 2  | 58 ± 95           | 9017 ± 14682                         | 0.1843 ± 0.0010                     | 502 ± 2                         | 522 ± 2                        | 14151 ± 83      | <b>14149 ± 83</b>  |
| FS2-10_7mm | 10.9             | 901 ± 2  | 58 ± 91           | 8899 ± 13943                         | 0.1877 ± 0.0017                     | 485 ± 2                         | 506 ± 2                        | 14603 ± 143     | <b>14600 ± 143</b> |
| FS2-12_4mm | 12.6             | 927 ± 2  | 27 ± 87           | 19818 ± 62585                        | 0.1920 ± 0.0022                     | 499 ± 2                         | 520 ± 2                        | 14815 ± 185     | <b>14813 ± 185</b> |
| FS2-14_2mm | 14.2             | 861 ± 2  | 22 ± 108          | 23392 ± 115396                       | 0.1940 ± 0.0010                     | 510 ± 2                         | 532 ± 2                        | 14853 ± 81      | <b>14852 ± 81</b>  |
| FS2-16_0mm | 15.9             | 1026 ± 3 | 37 ± 90           | 16767 ± 40958                        | 0.1965 ± 0.0009                     | 510 ± 2                         | 532 ± 2                        | 15058 ± 74      | <b>15057 ± 74</b>  |
| FS2-19_7mm | 20.2             | 1039 ± 3 | 27 ± 52           | 25314 ± 48974                        | 0.2125 ± 0.0010                     | 531 ± 2                         | 556 ± 2                        | 16122 ± 81      | <b>16121 ± 81</b>  |
| FS2-24_2mm | 24.5             | 1010 ± 3 | 513 ± 49          | 1384 ± 133                           | 0.2300 ± 0.0009                     | 514 ± 1                         | 540 ± 1                        | 17779 ± 77      | <b>17760 ± 78</b>  |
| FS2-27_8mm | 28.2             | 1025 ± 3 | 686 ± 60          | 1160 ± 101                           | 0.2540 ± 0.0014                     | 515 ± 4                         | 544 ± 4                        | 19773 ± 129     | <b>19748 ± 130</b> |
| FS2-31_8mm | 32.0             | 1101 ± 3 | 41 ± 62           | 22534 ± 34299                        | 0.2748 ± 0.0011                     | 494 ± 1                         | 525 ± 1                        | 21878 ± 96      | <b>21877 ± 96</b>  |
| FS2-35_3mm | 35.8             | 1058 ± 3 | 76 ± 66           | 13651 ± 11854                        | 0.3208 ± 0.0014                     | 520 ± 3                         | 558 ± 3                        | 25459 ± 132     | <b>25457 ± 132</b> |

Corrected ages use a calculated initial  $^{230}\text{Th}/^{232}\text{Th}$  atomic ratio = 8.8 ppm ±50%. Years before present = yr B.P., where present is AD 2010. All errors are absolute 2 $\sigma$ . Subsample sizes ranged from 40 to 100 mg. Dist. = distance in mm from stalagmite top.

Due to age anomalies from physical distance measurements and larger drill-hole sizes, 10 additional subsample powders were drilled and analyzed producing 10 new U-series dates (Table DR4). Five of these drilled in the stalagmite area representing 14 to 15 ka supplement four previously published dates (Asmerom et al., 2010) in that area to more accurately establish the  $\delta^{18}\text{O}$  excursion interpreted to be the initiation of the Bølling oscillation in GICC05. Five additional new U-series dates lie on the originally published growth curve between 25 and 16 kyr BP. A new polynomial curve was generated for the growth history from all but three data points shown as empty red circles (Figure DR3).
